# Supplementary material for: Accumulation and loss of asymmetric non-CpG methylation during male germ-cell development
Source: PubMed Central journal article supplement — Nucleic Acids Res. 2012 Nov 22;41(2):738–45. doi: 10.1093/nar/gks1117 (PMC3553940; doi:10.1093/nar/gks1117), 2012-11-22

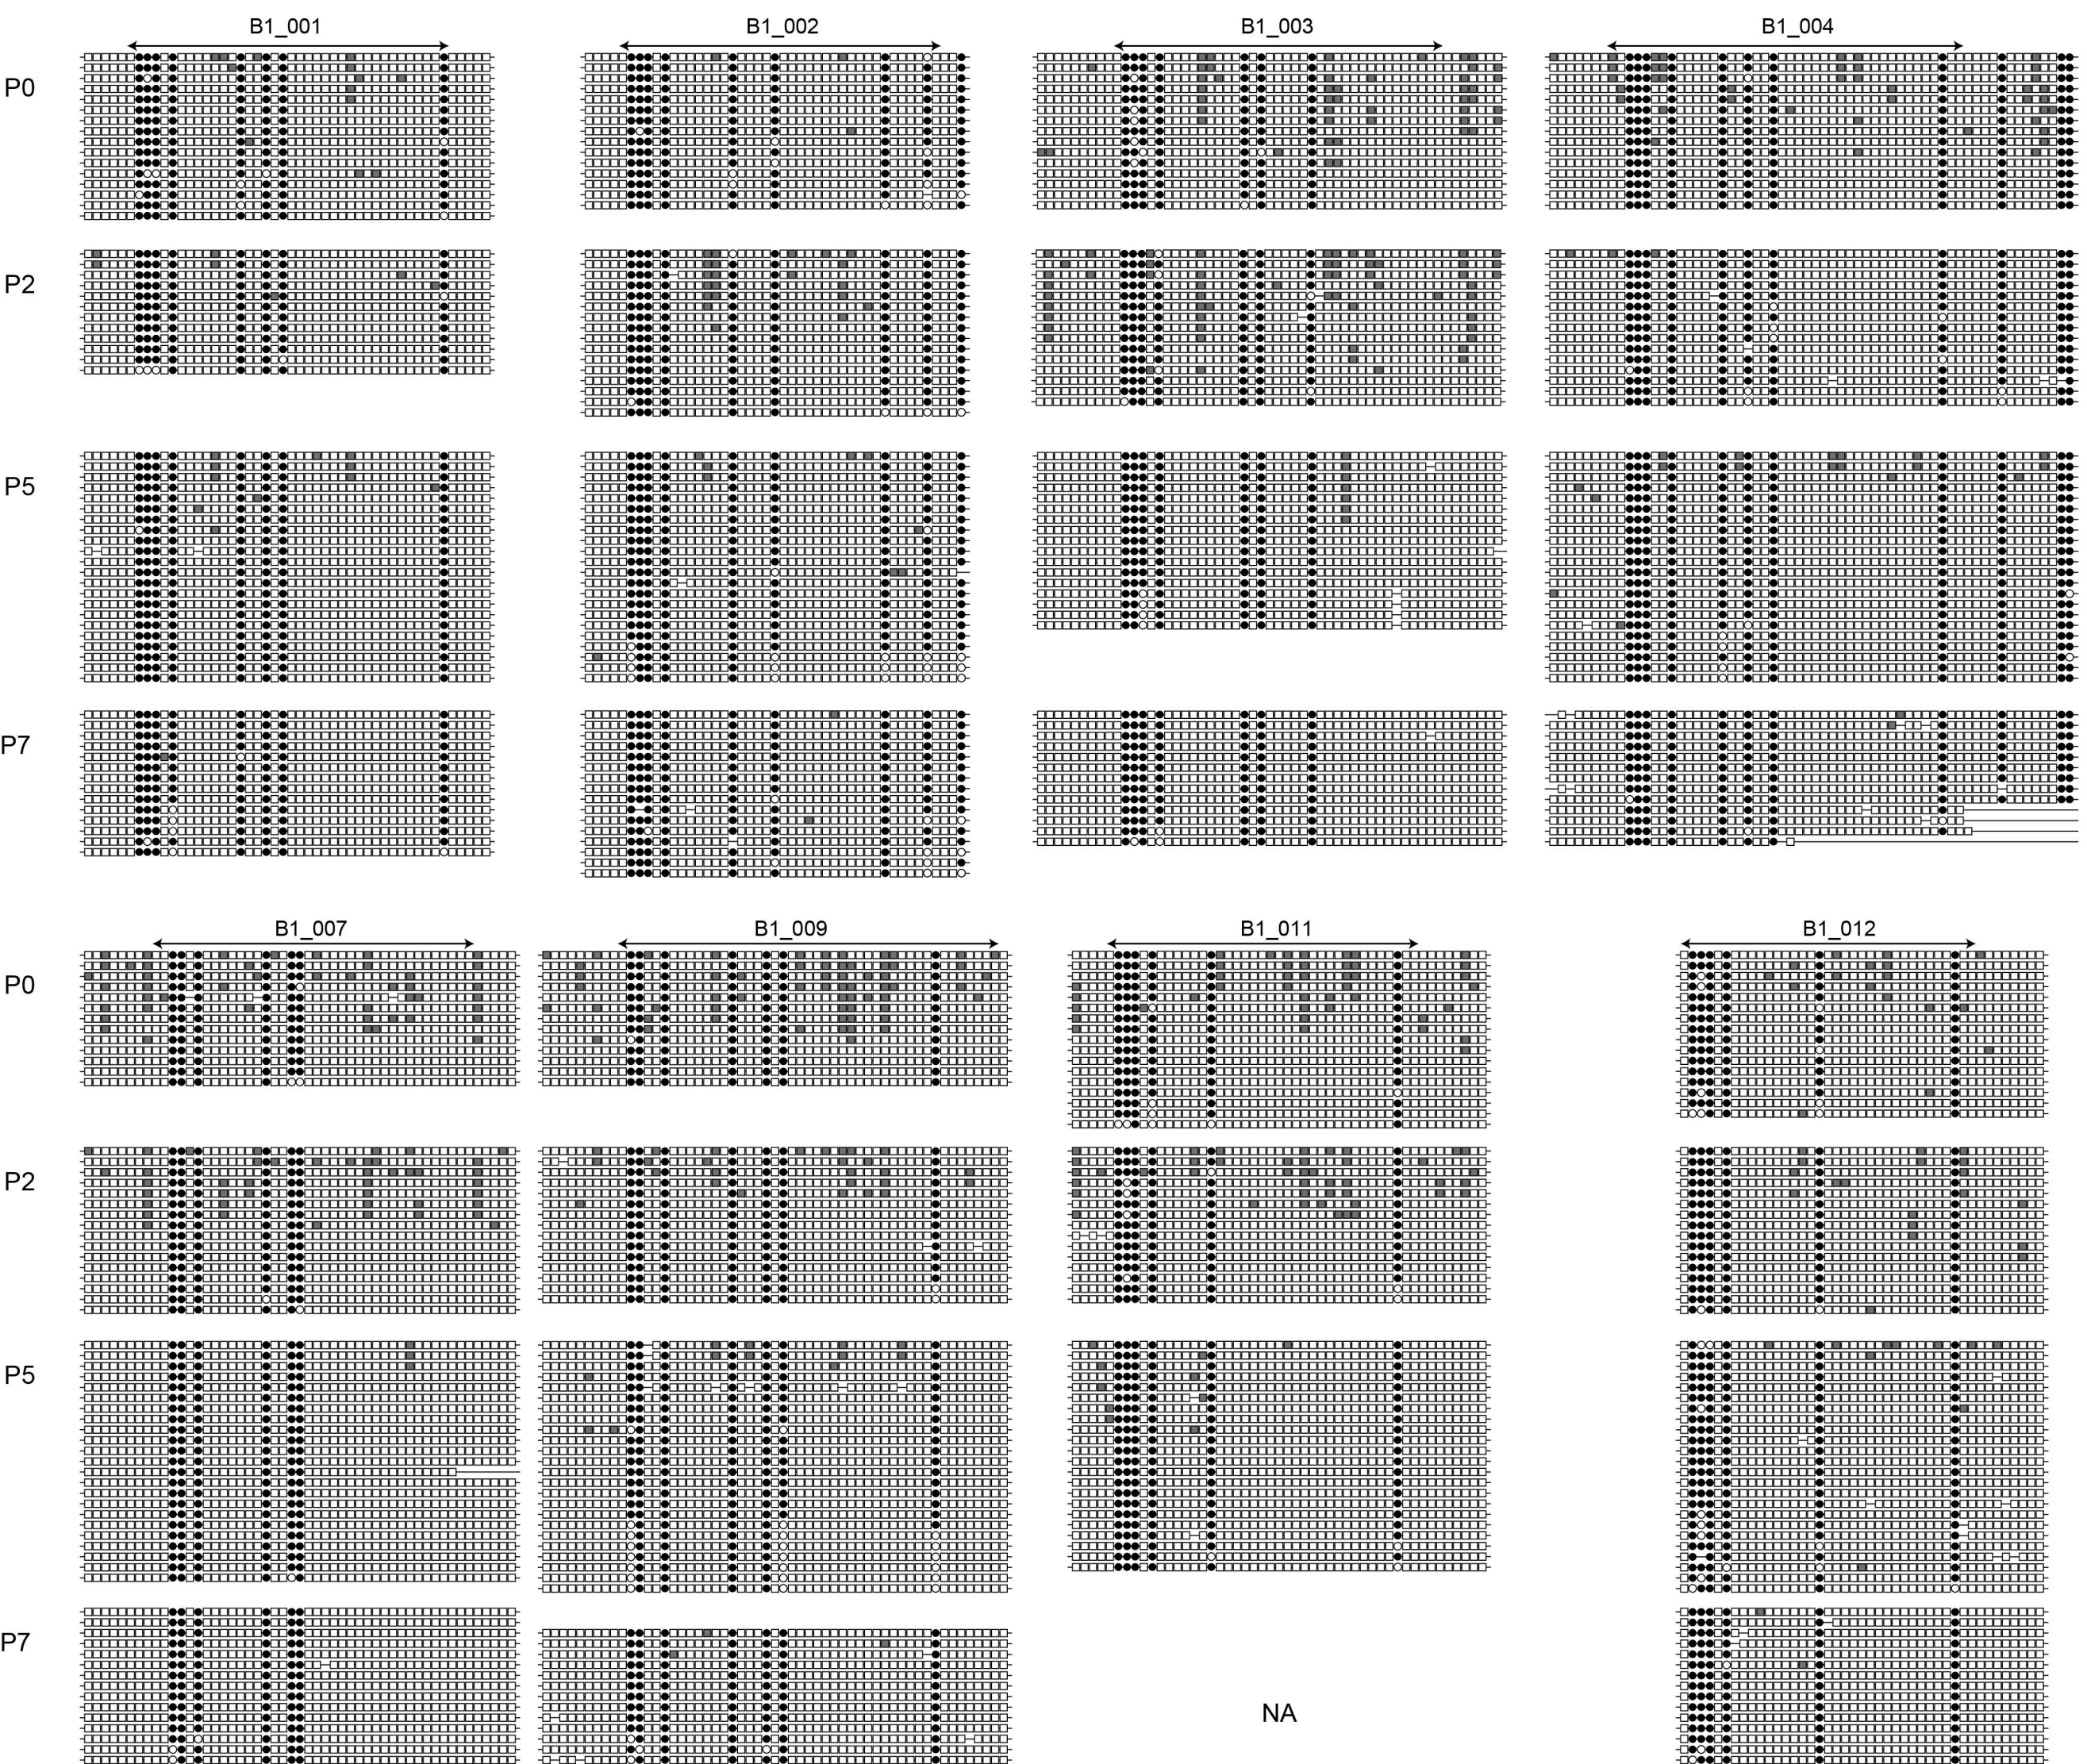



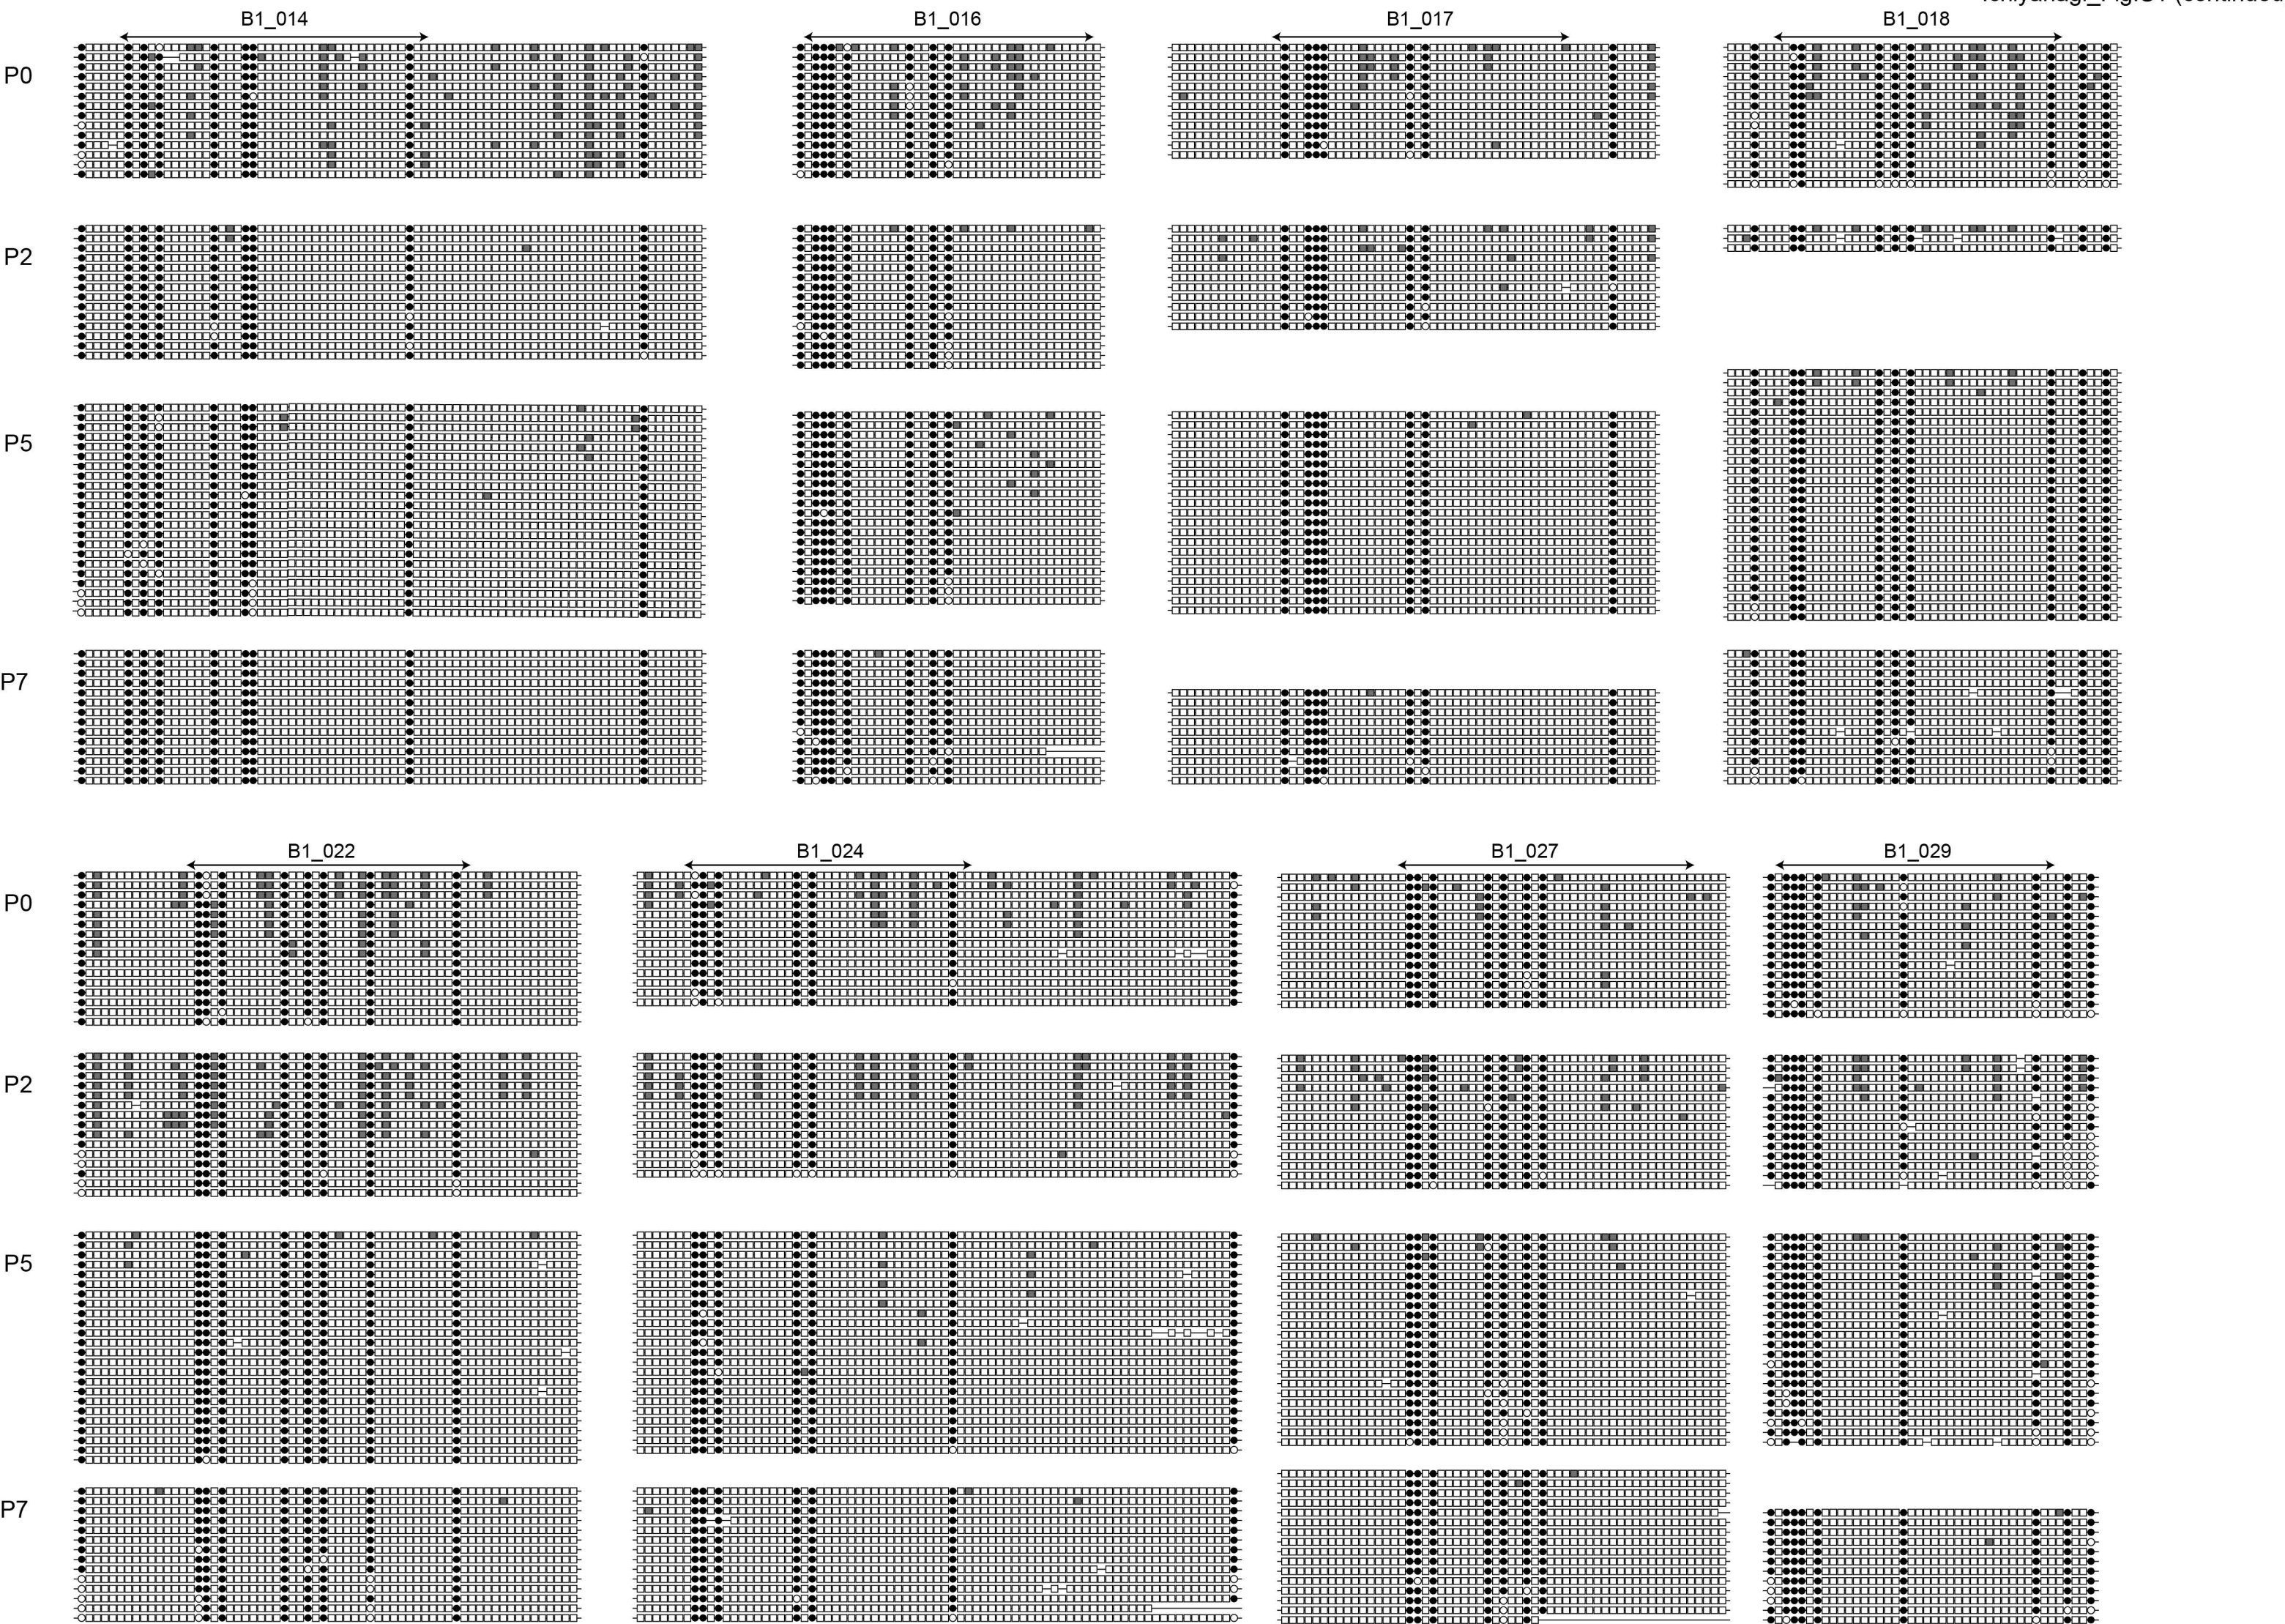



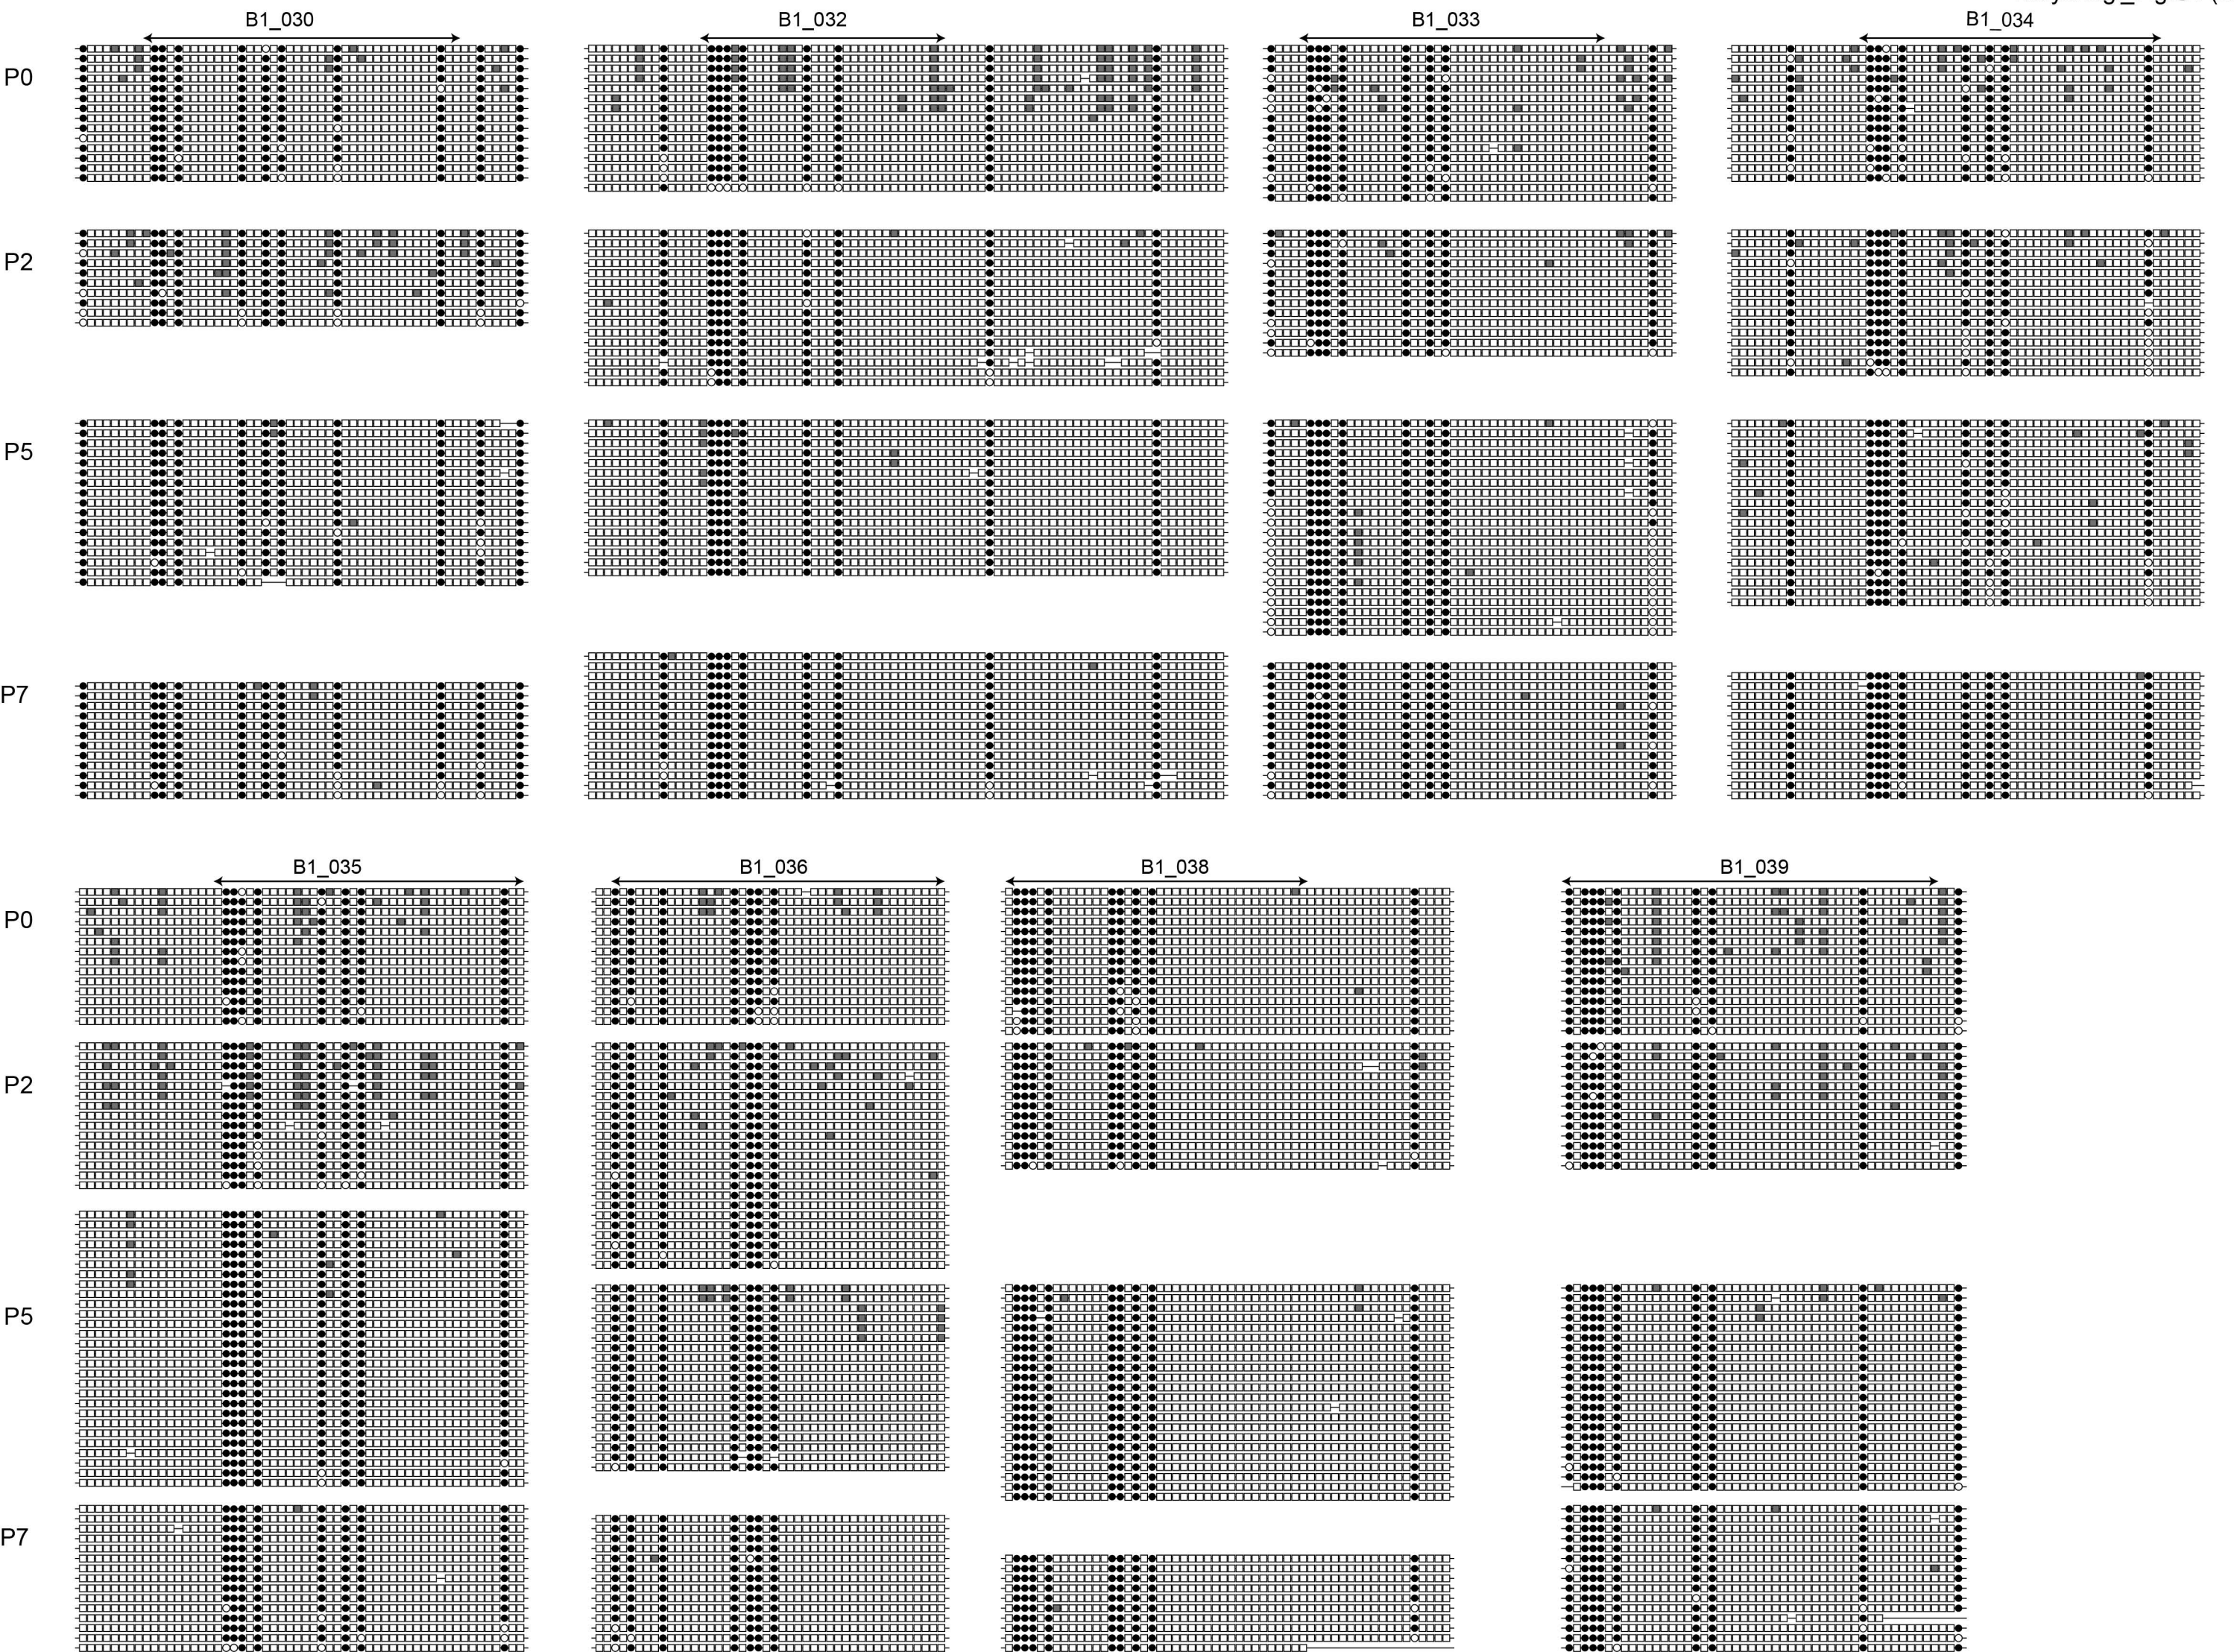



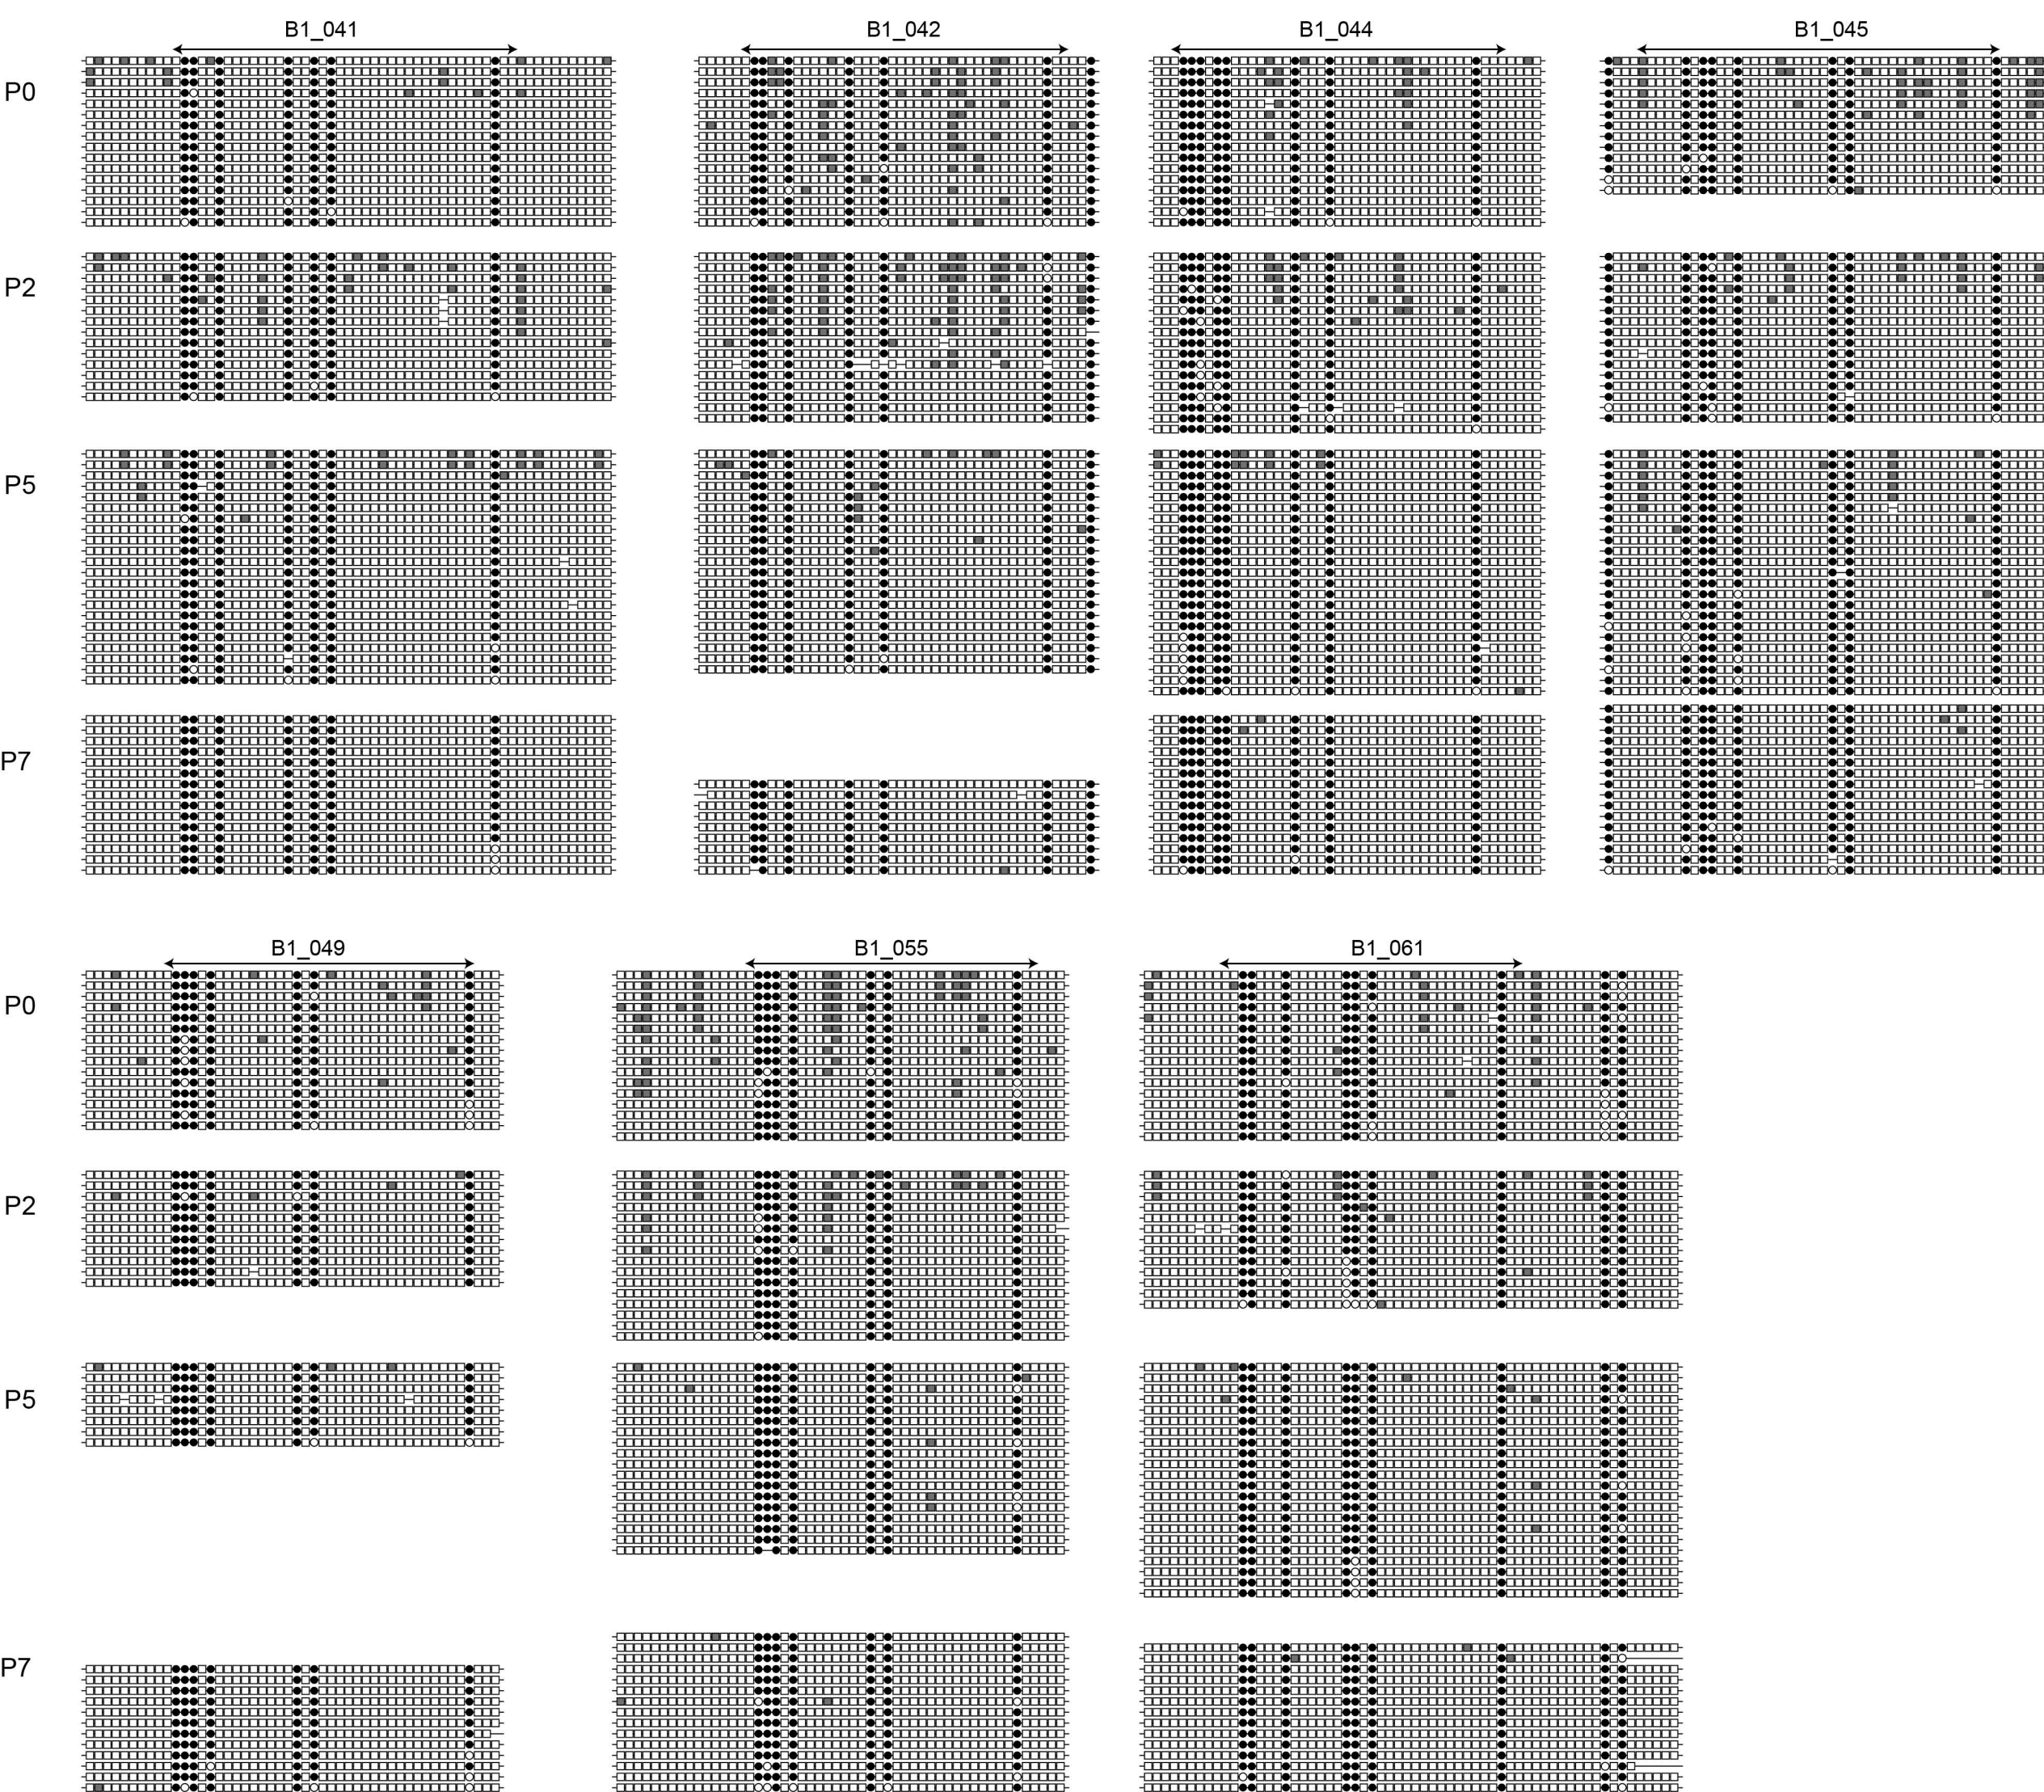



## A. Paternally methylated DMRs

|    |      |
|----|------|
| CG | 91%  |
| CA | 8.6% |
| CC | 1.6% |
| CT | 4.4% |

*H19*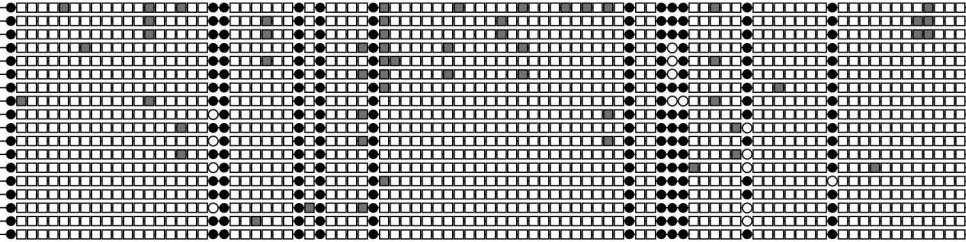*Dlk1/Meg3*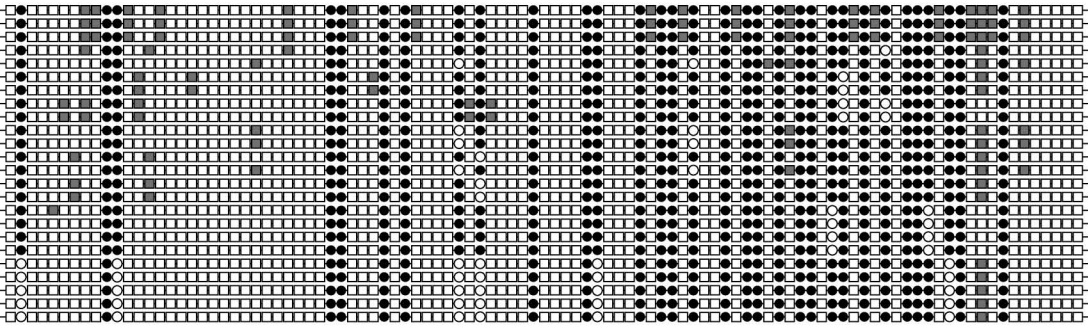*Rasgraf1*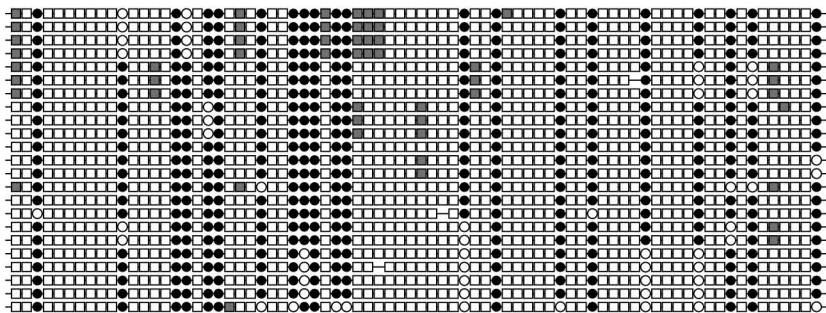

## B. CpG islands

|    |      |
|----|------|
| CG | 59%  |
| CA | 5.2% |
| CC | 0.2% |
| CT | 2.5% |

CGI#11-20 (*Sfi1*)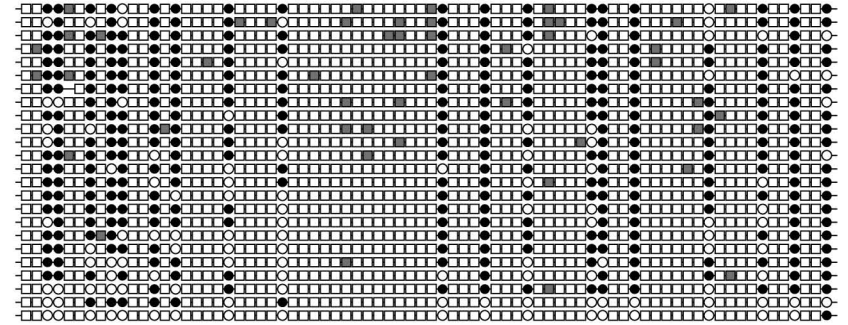CGI#5-1397 (*Tmem184a*)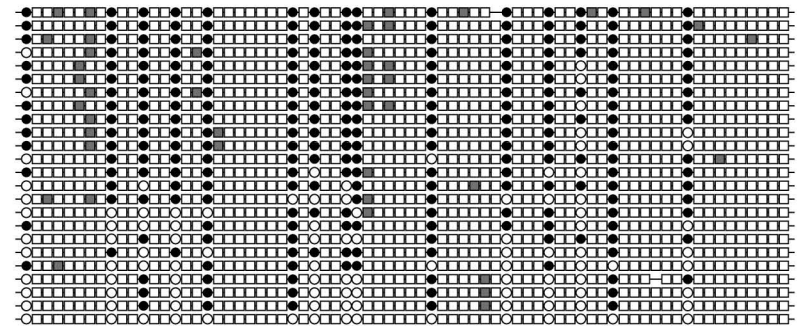CGI#4-1245 (*Spen*)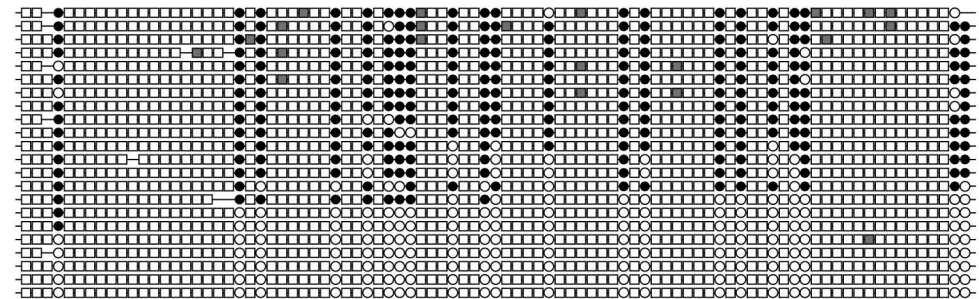

CGI#4-1071 (intergenic)

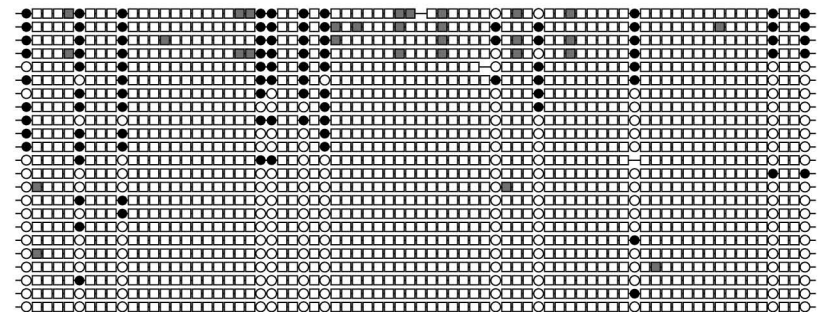

Supplement: supp_gks1117_nar-01899-v-2012-File006.pdf [file supp_gks1117_nar-01899-v-2012-File006.pdf]
